# Supplementary material
Source: PubMed Central journal article supplement (PMC1783361)

**A**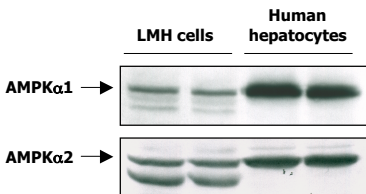**B**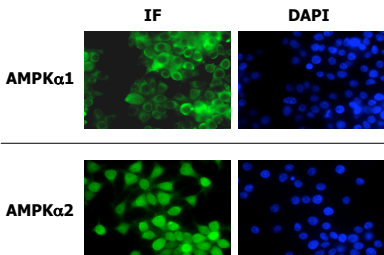**C**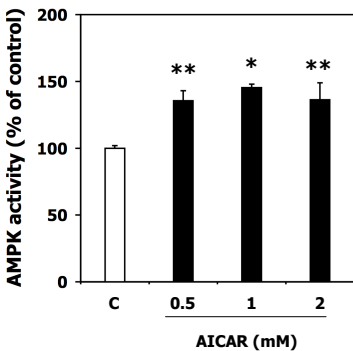

Supplement: pnas_0610216104_1.pdf [file pnas_0610216104_1.pdf]

**A**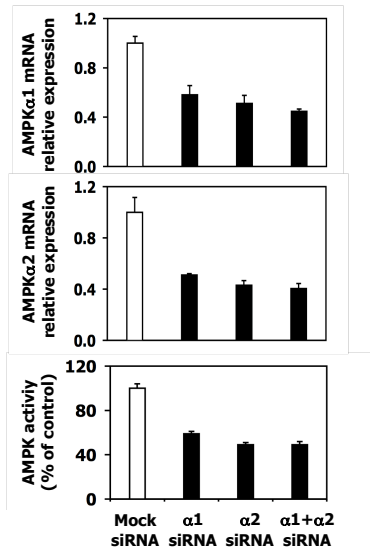**B**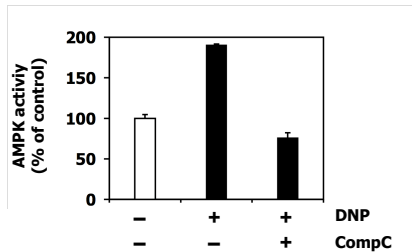

Supplement: pnas_0610216104_2.pdf [file pnas_0610216104_2.pdf]

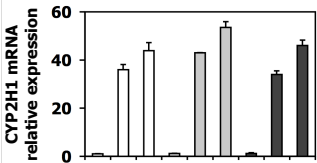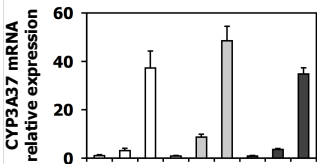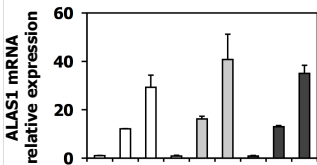

**C PB M C PB M C PB M**  
**Mock LKB1 LKB1 DN**

Supplement: pnas_0610216104_3.pdf [file pnas_0610216104_3.pdf]
